# Supplementary material for: A green electrochemical method for the synthesis of new N,N′-diphenylbenzene-1,4-diamine derivatives
Source: Royal Society of Chemistry journal article supplement (doi:10.1039/c4ra17102k), 2015-01-01

## Supporting Information

### **A green electrochemical method for the synthesis of new *N,N'*- diphenylbenzene-1,4-diamine derivatives**

**Davood Nematollahi,\* Saeideh Mahdinia, Sajad Kaihani and Hamid Salehzadeh**

*Faculty of Chemistry, Bu-Ali-Sina University, Hamedan 65178-38683, I. R. Iran*

[nemat@basu.ac.ir](mailto:nemat@basu.ac.ir)

## Table of Contents:

|                                                 |     |
|-------------------------------------------------|-----|
| <sup>1</sup> H NMR spectrum of <b>2a</b> .....  | S1  |
| <sup>13</sup> C NMR spectrum of <b>2a</b> ..... | S2  |
| <sup>13</sup> C NMR spectrum of <b>2a</b> ..... | S3  |
| FT-IR spectrum of <b>2a</b> .....               | S4  |
| <sup>1</sup> H NMR spectrum of <b>2b</b> .....  | S5  |
| <sup>1</sup> H NMR spectrum of <b>2b</b> .....  | S6  |
| <sup>13</sup> C NMR spectrum of <b>2b</b> ..... | S7  |
| FT-IR spectrum of <b>2b</b> .....               | S8  |
| MS spectrum of <b>2b</b> .....                  | S9  |
| <sup>1</sup> H NMR spectrum of <b>2c</b> .....  | S10 |
| <sup>1</sup> H NMR spectrum of <b>2c</b> .....  | S11 |
| <sup>13</sup> C NMR spectrum of <b>2c</b> ..... | S12 |
| <sup>13</sup> C NMR spectrum of <b>2c</b> ..... | S13 |
| FT-IR spectrum of <b>2c</b> .....               | S14 |
| MS spectrum of <b>2c</b> .....                  | S15 |
| <sup>1</sup> H NMR spectrum of <b>2d</b> .....  | S16 |
| <sup>13</sup> C NMR spectrum of <b>2d</b> ..... | S17 |
| FT-IR spectrum of <b>2d</b> .....               | S18 |
| MS spectrum of <b>2d</b> .....                  | S19 |
| <sup>1</sup> H NMR spectrum of <b>2e</b> .....  | S20 |
| <sup>13</sup> C NMR spectrum of <b>2e</b> ..... | S21 |
| FT-IR spectrum of <b>2e</b> .....               | S22 |
| MS spectrum of <b>2e</b> .....                  | S23 |

$^1\text{H}$  NMR spectrum of **2a**

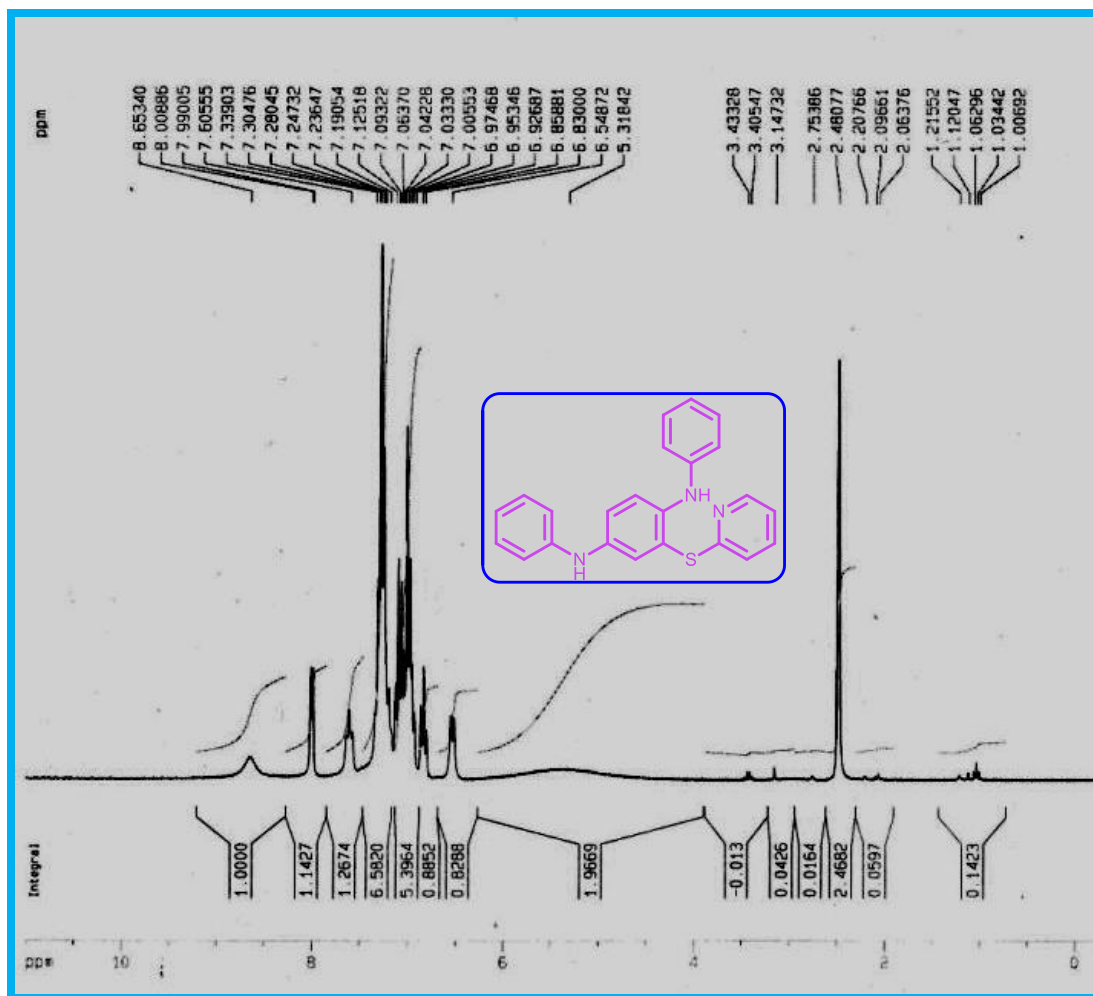

$^{13}\text{C}$  NMR spectrum of **2a**

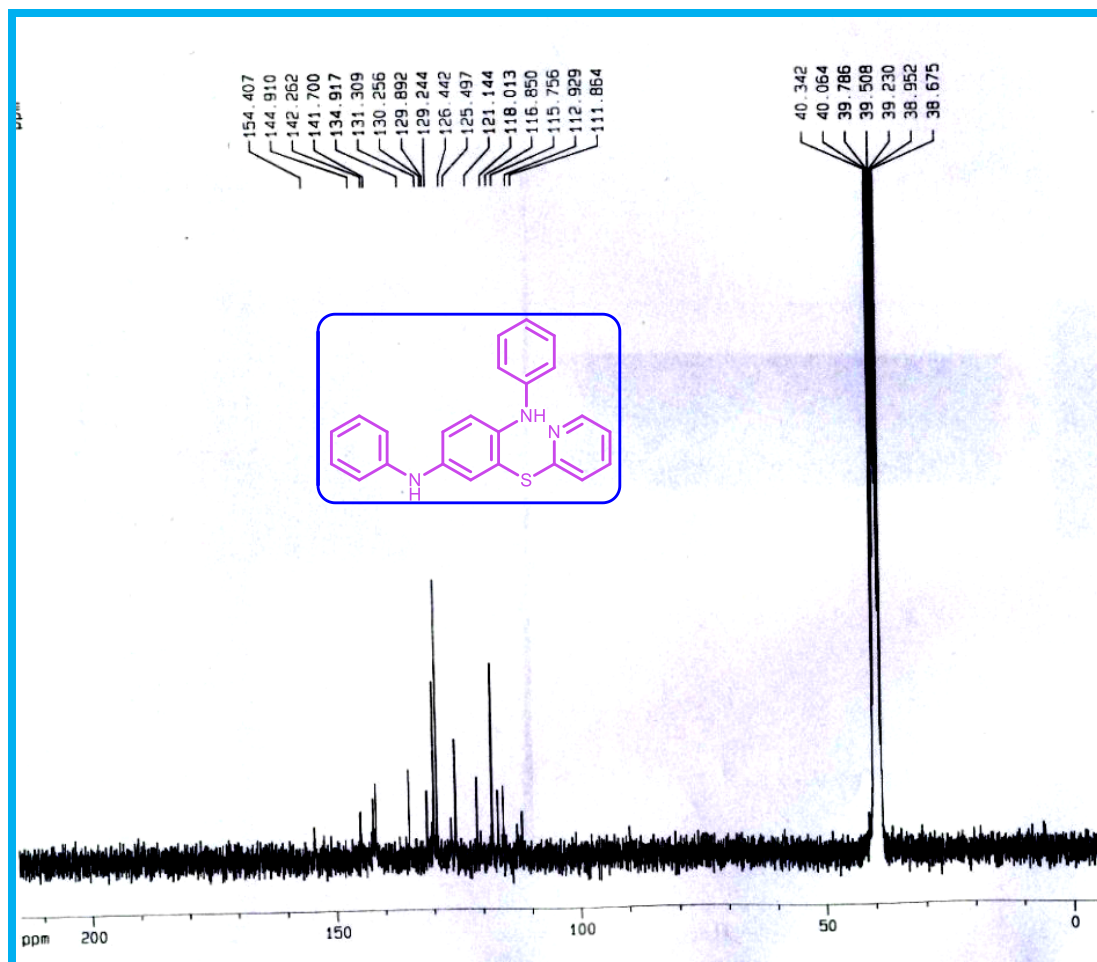

$^{13}\text{C}$  NMR spectrum of **2a**

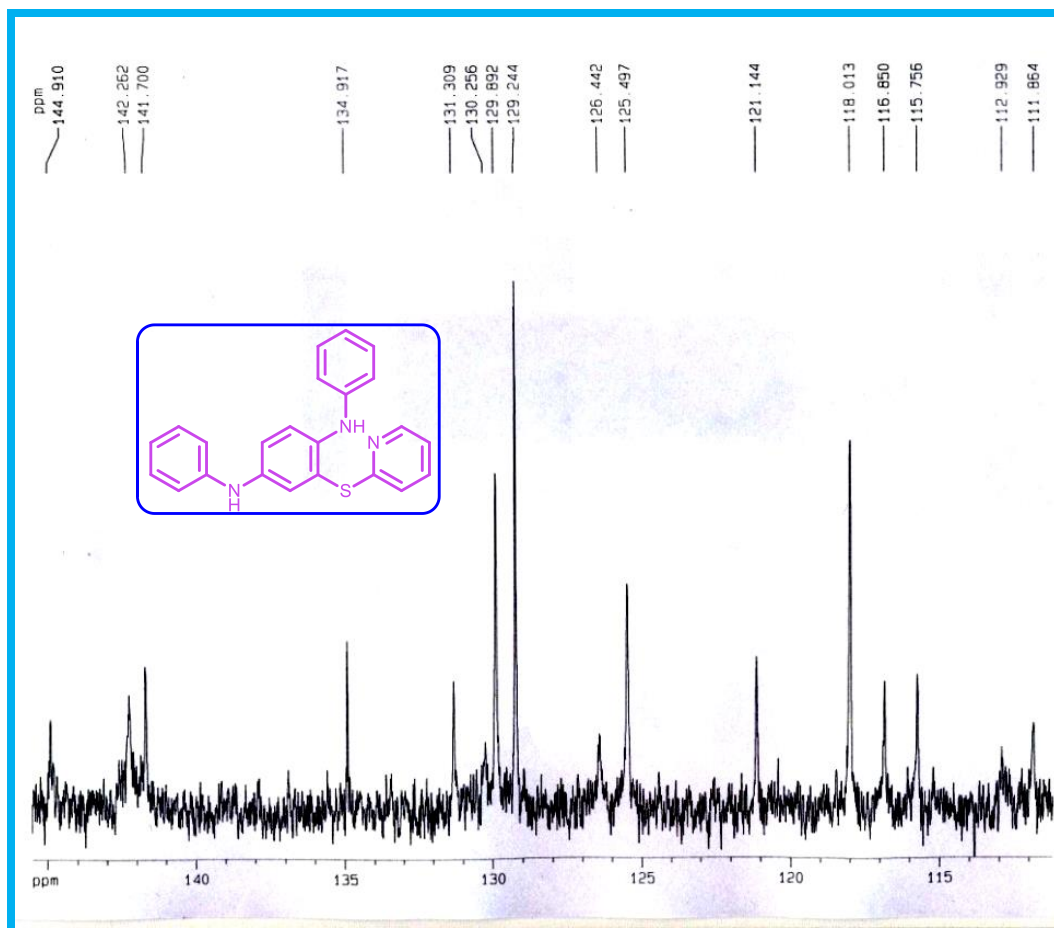

FT-IR spectrum of **2a**

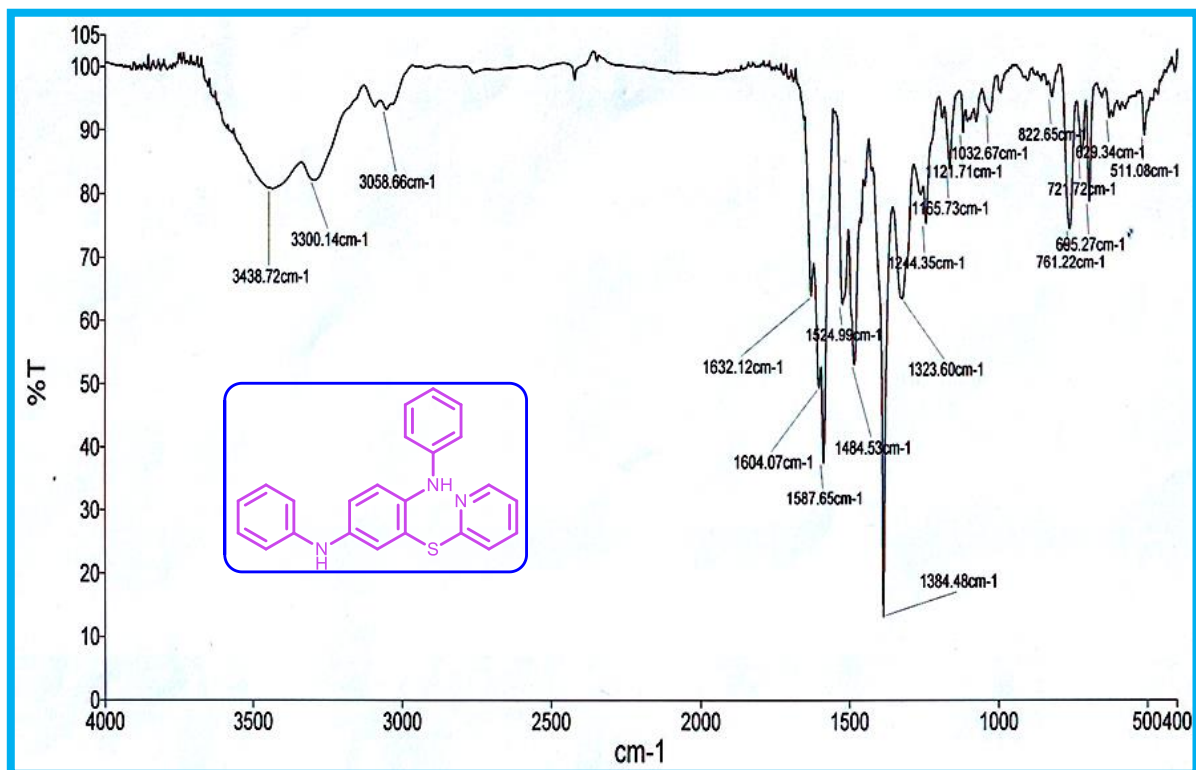

$^1\text{H}$  NMR spectrum of **2b**

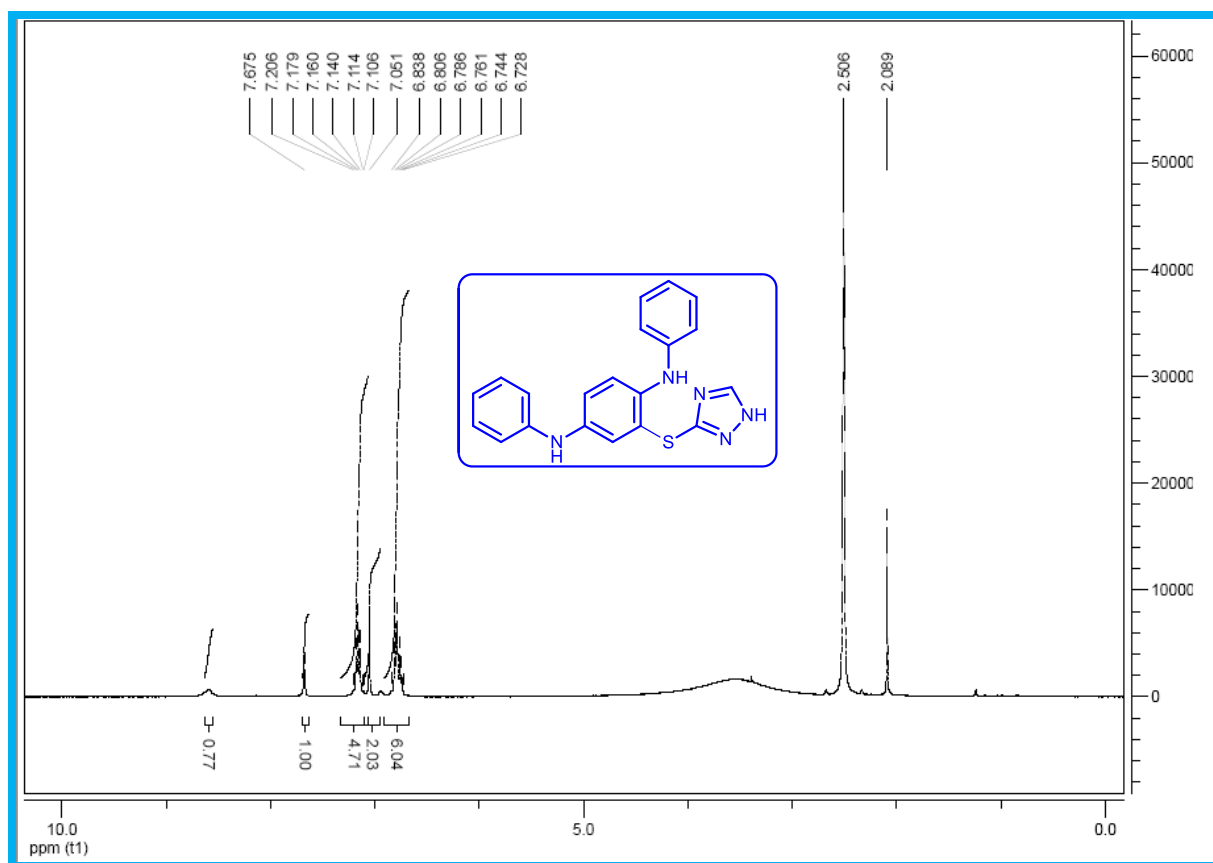

<sup>1</sup>H NMR spectrum of **2b**

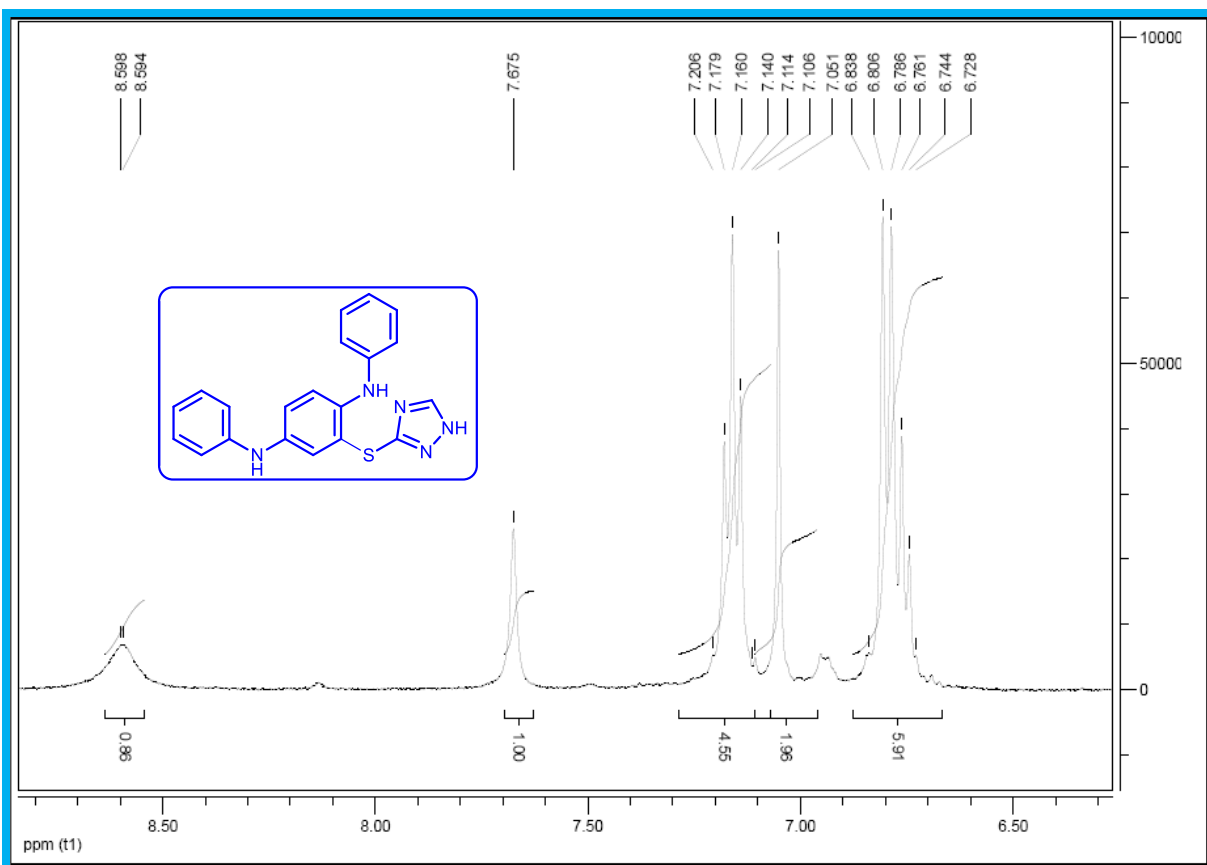



$^{13}\text{C}$  NMR spectrum of **2b**

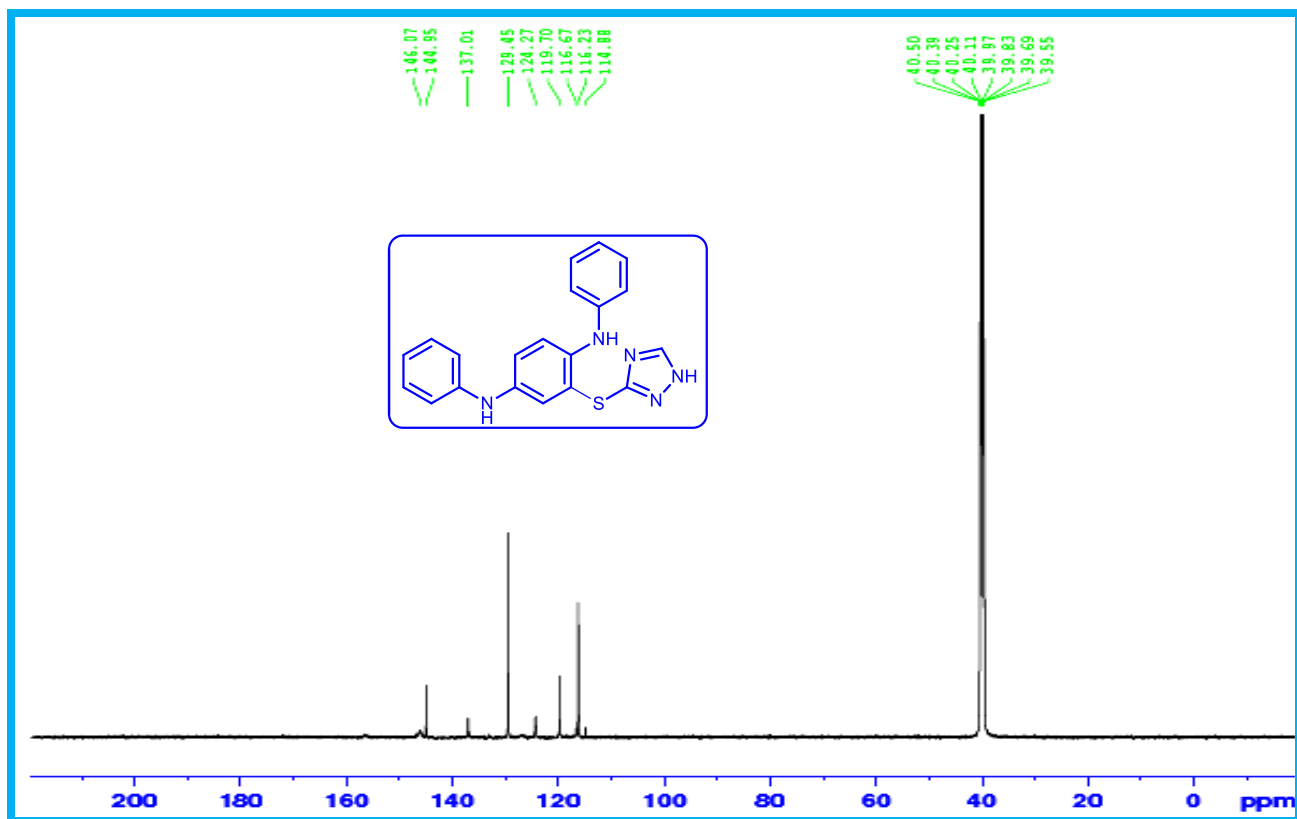

FT-IR spectrum of **2b**

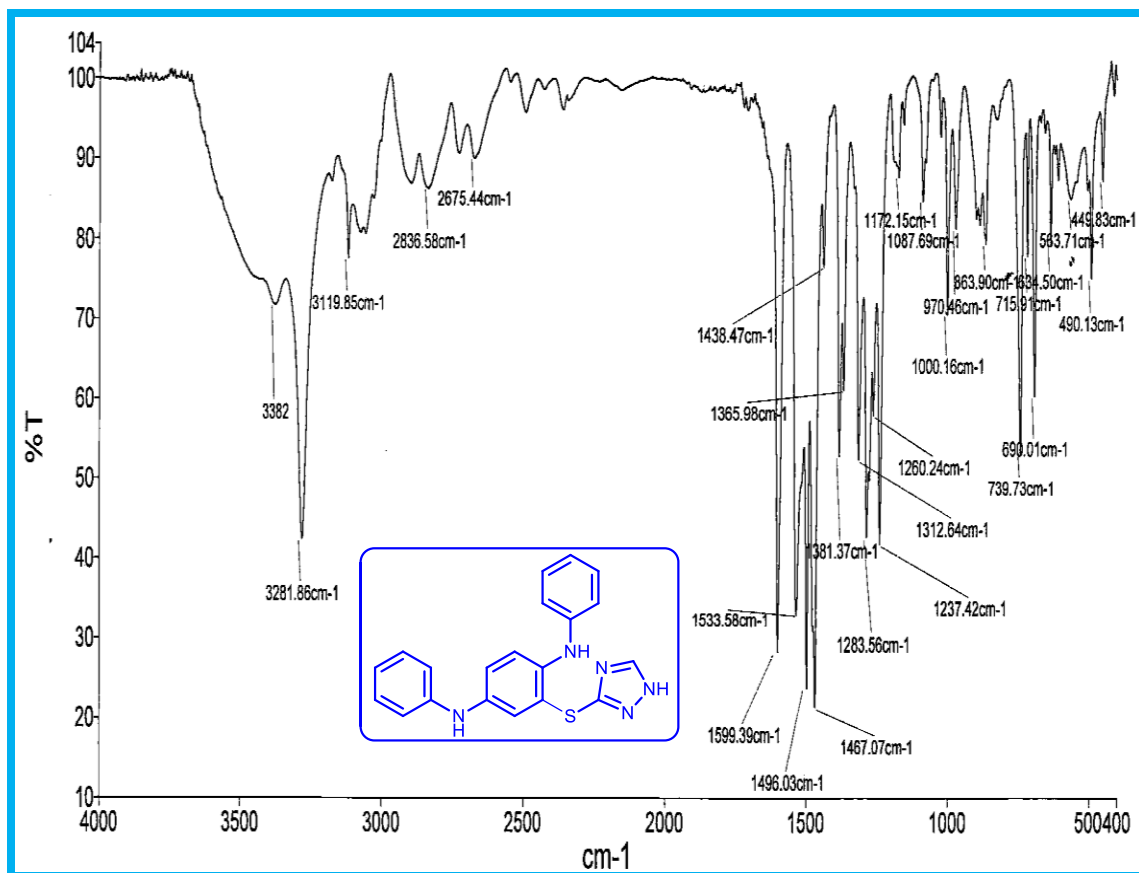

MS spectrum of **2b**

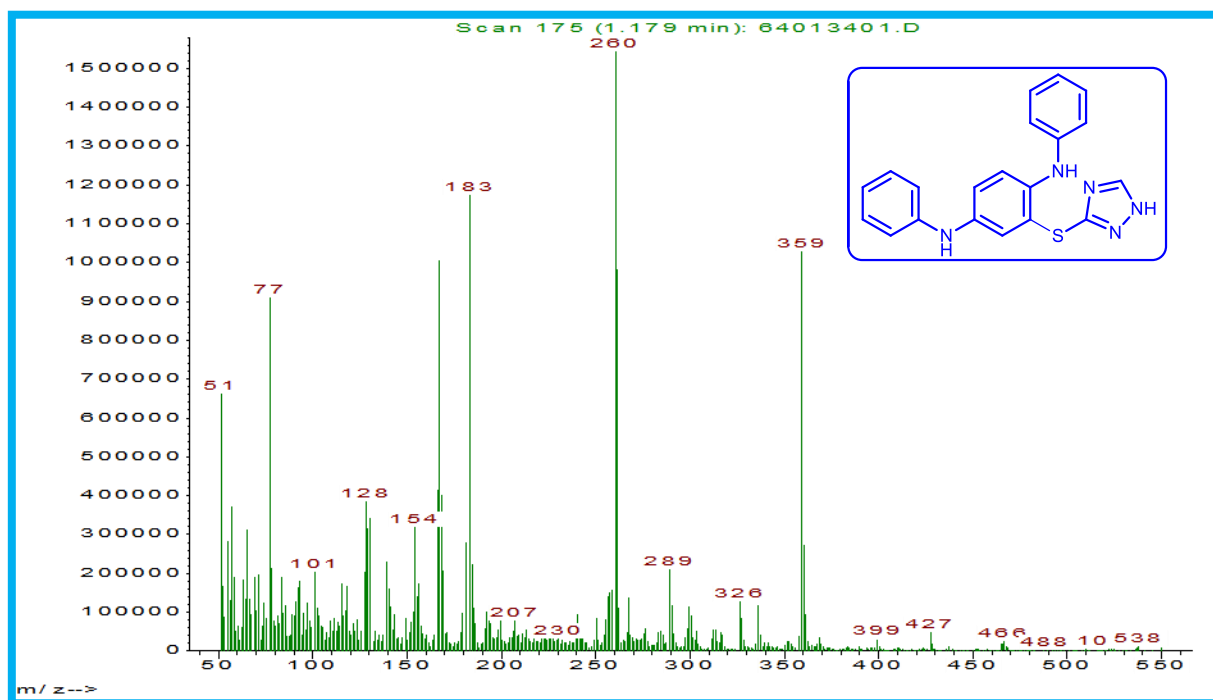

<sup>1</sup>H NMR spectrum of **2c**

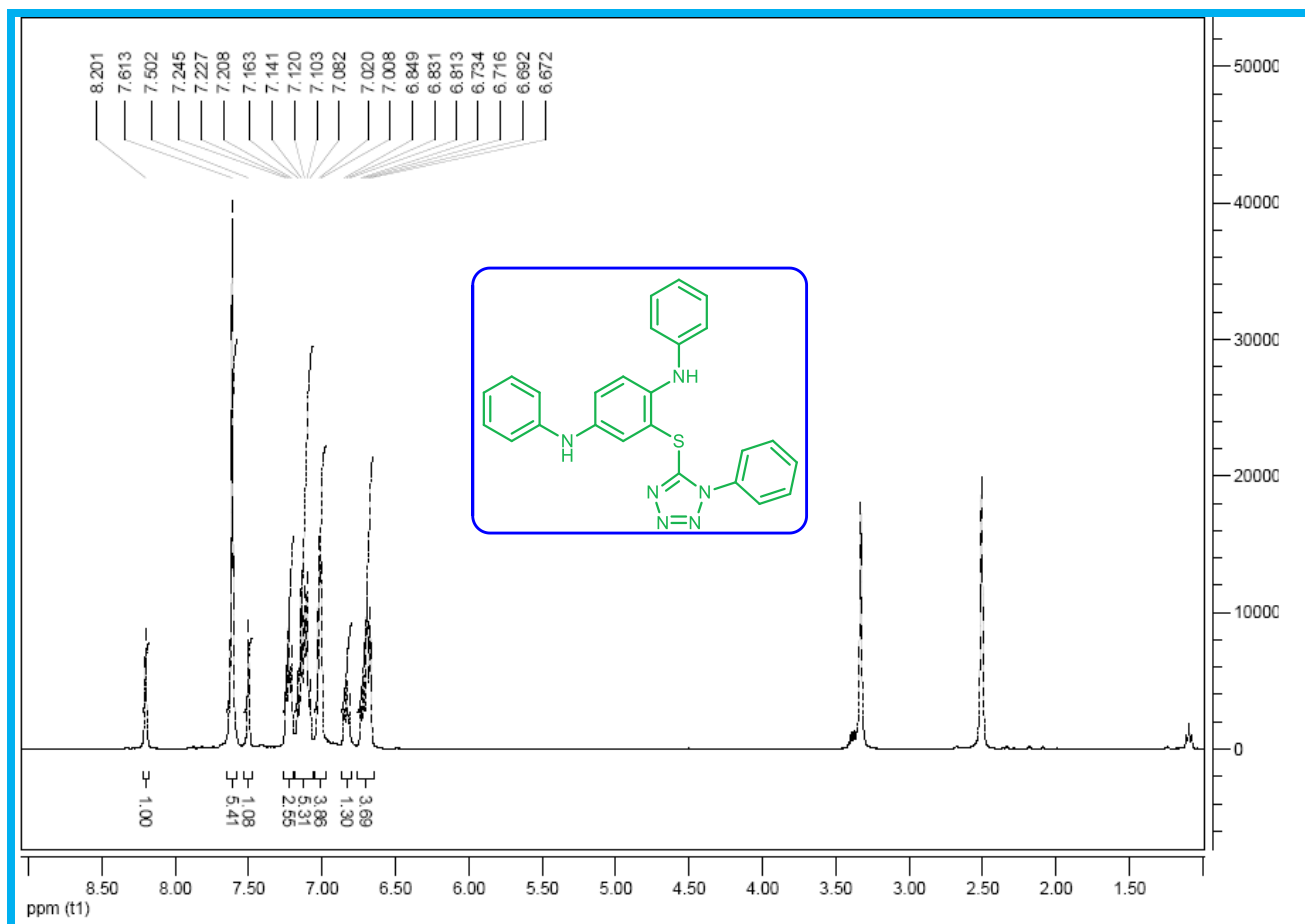

$^1\text{H}$  NMR spectrum of **2c**

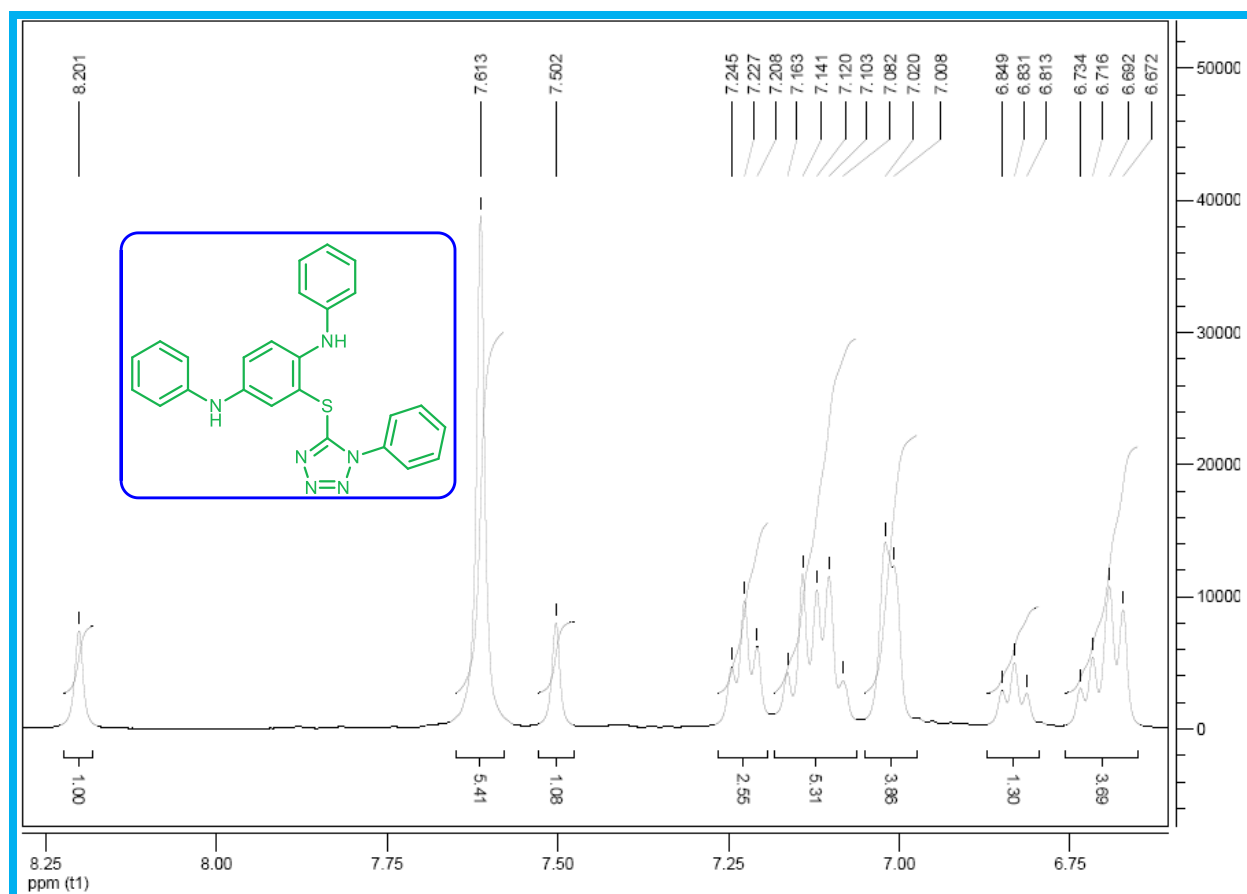

$^{13}\text{C}$  NMR spectrum of **2c**

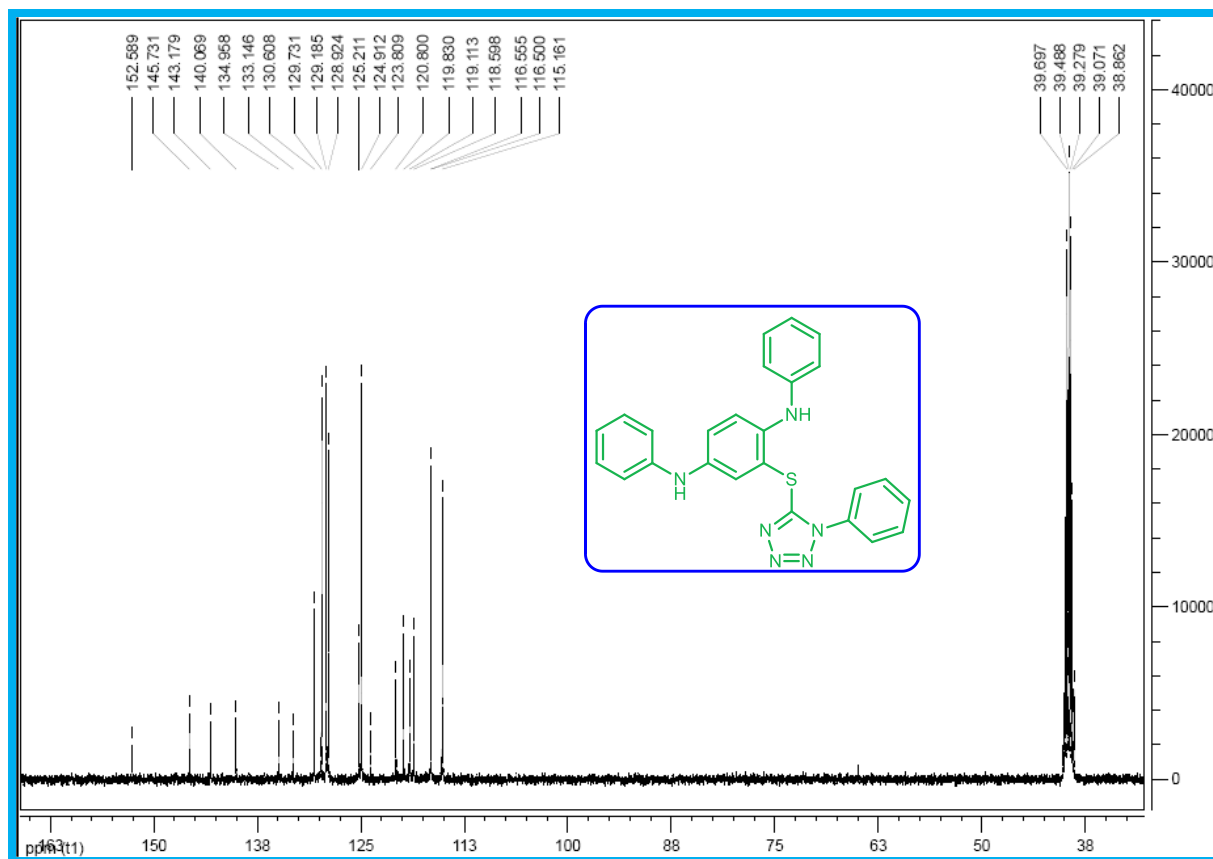

<sup>13</sup>C NMR spectrum of **2c**

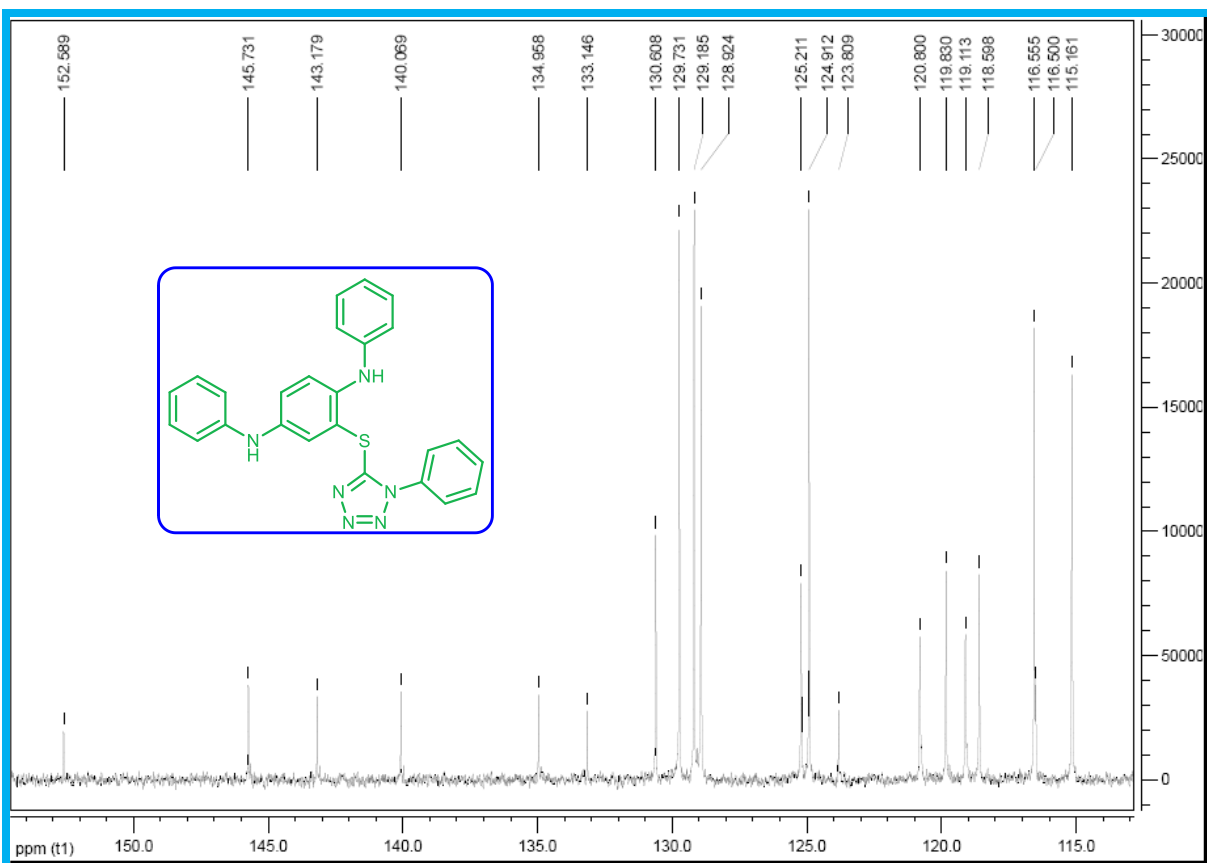

# FT-IR spectrum of 2c

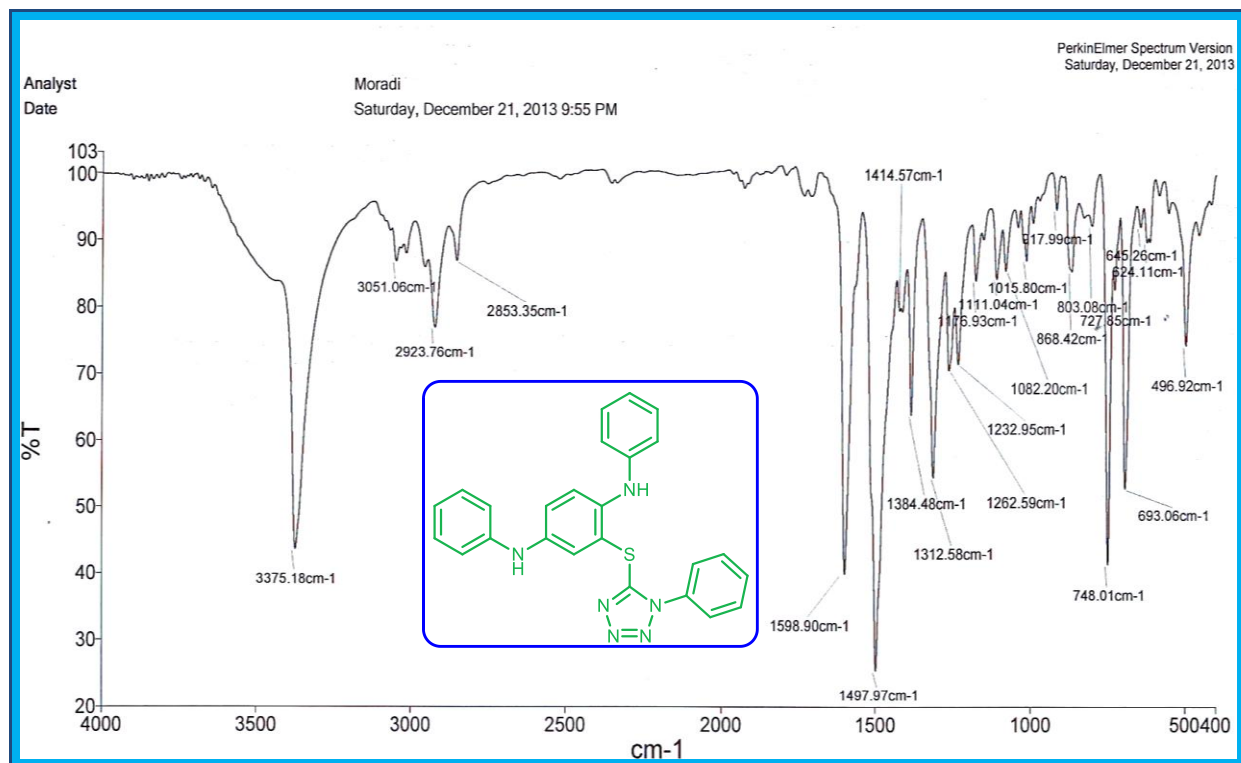



MS spectrum of 2c

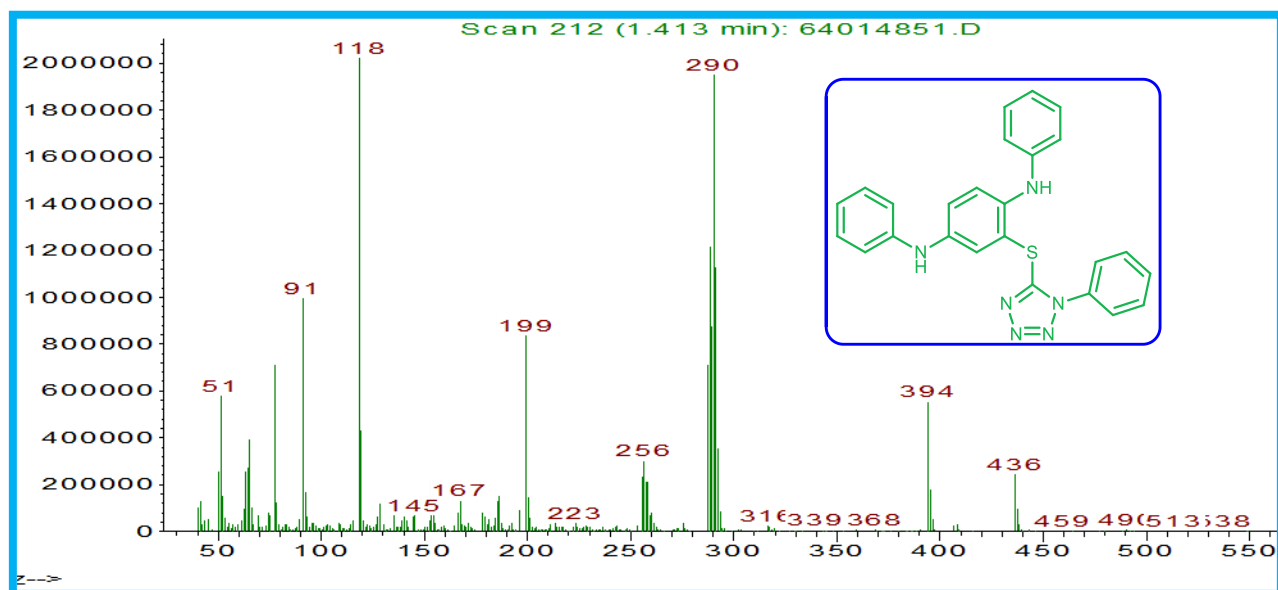

<sup>1</sup>H NMR spectrum of **2d**

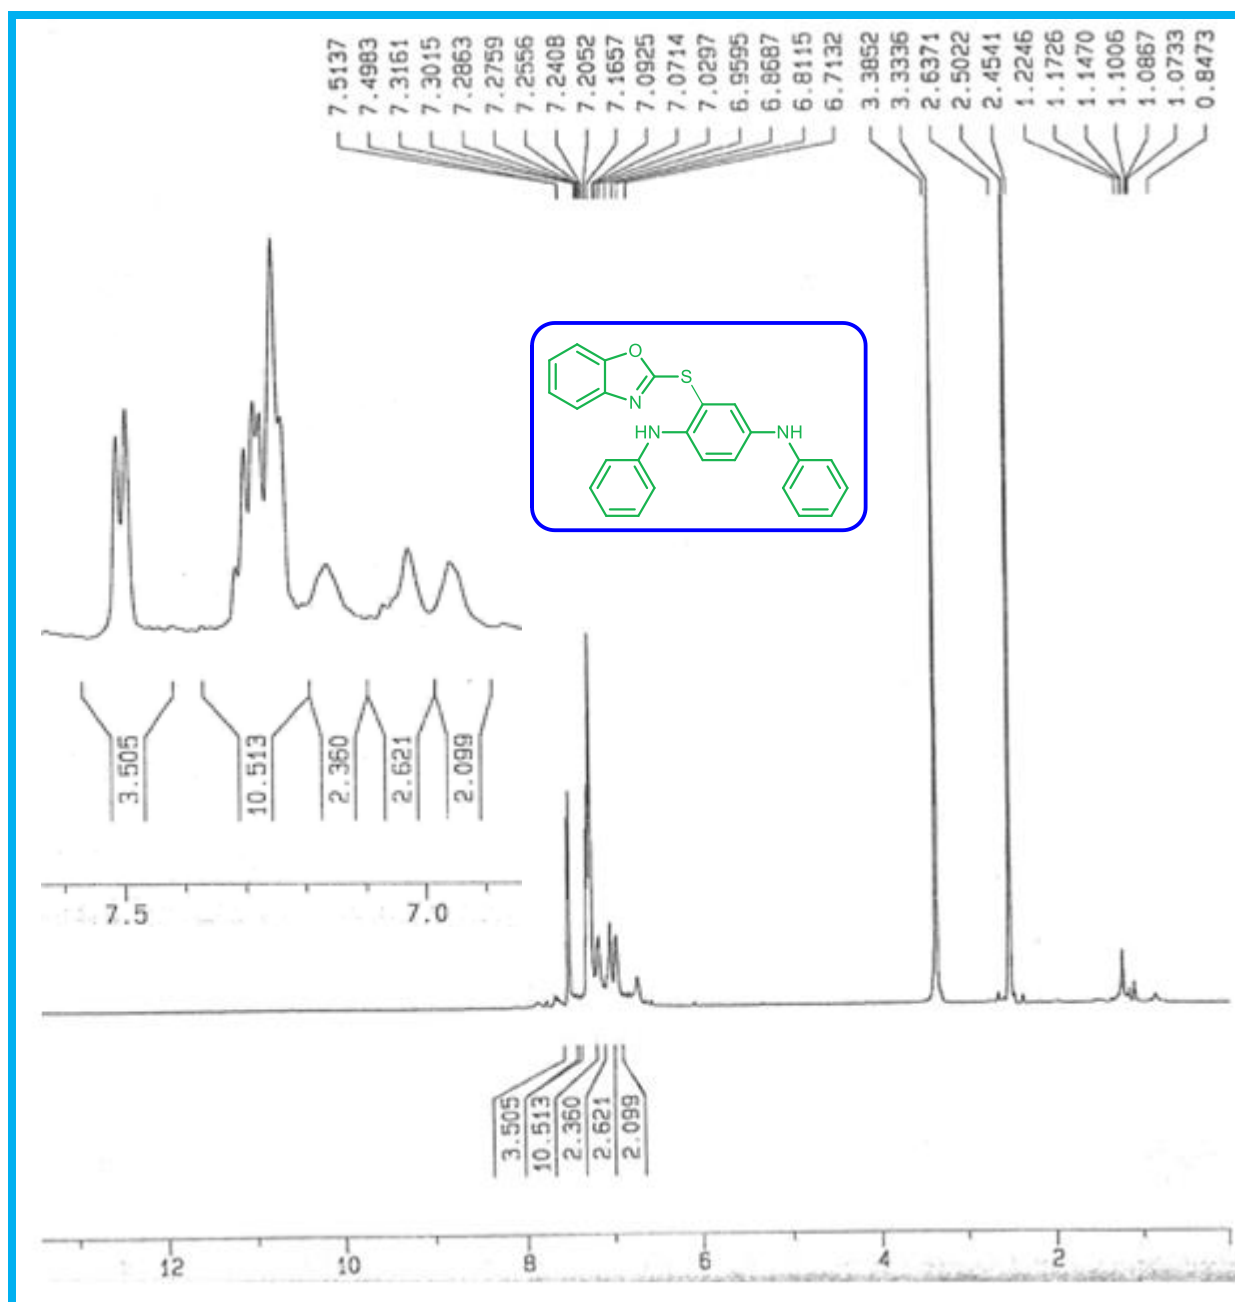

<sup>13</sup>C NMR spectrum of **2d**

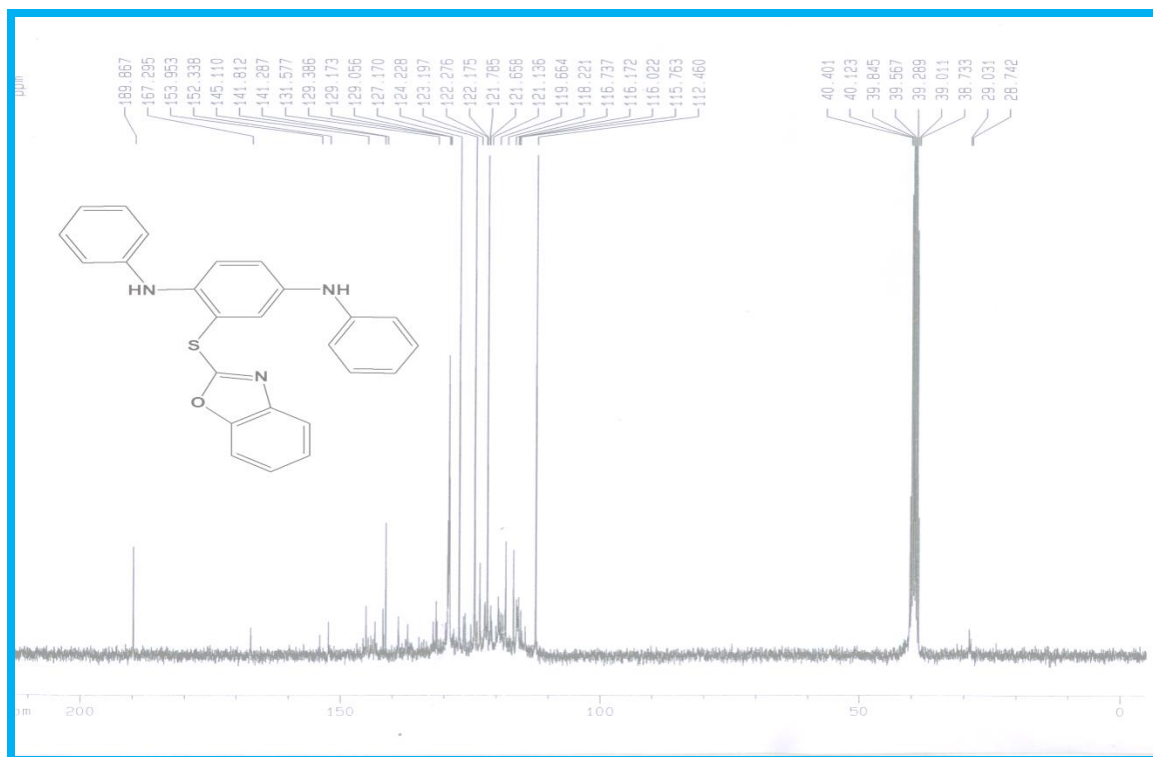

FT-IR spectrum of **2d**

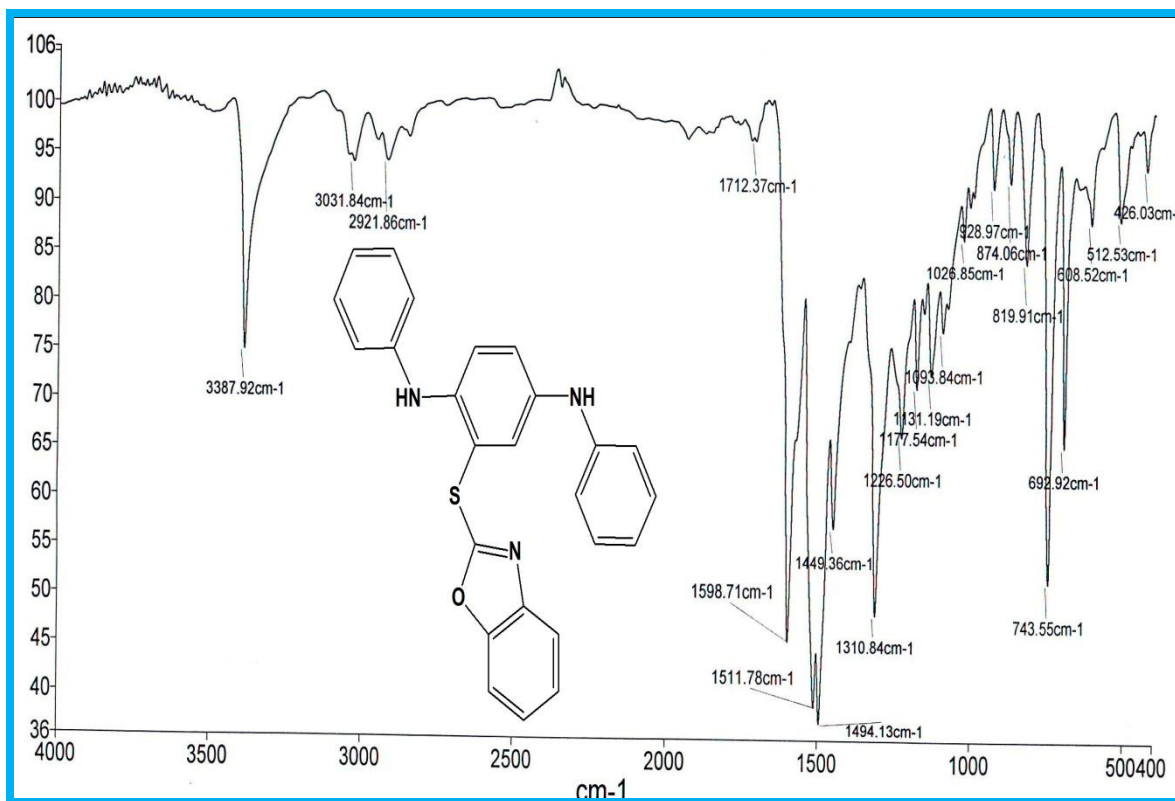

MS spectrum of **2d**

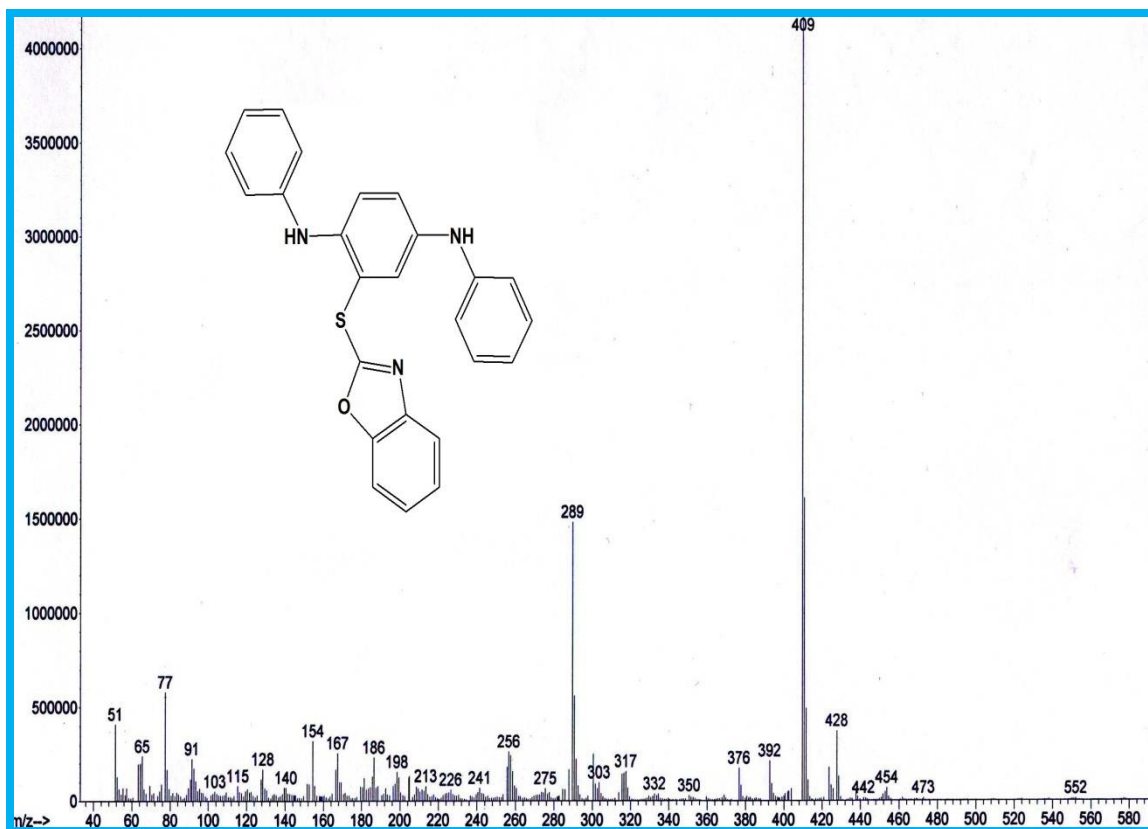

<sup>1</sup>H NMR spectrum of **2e**

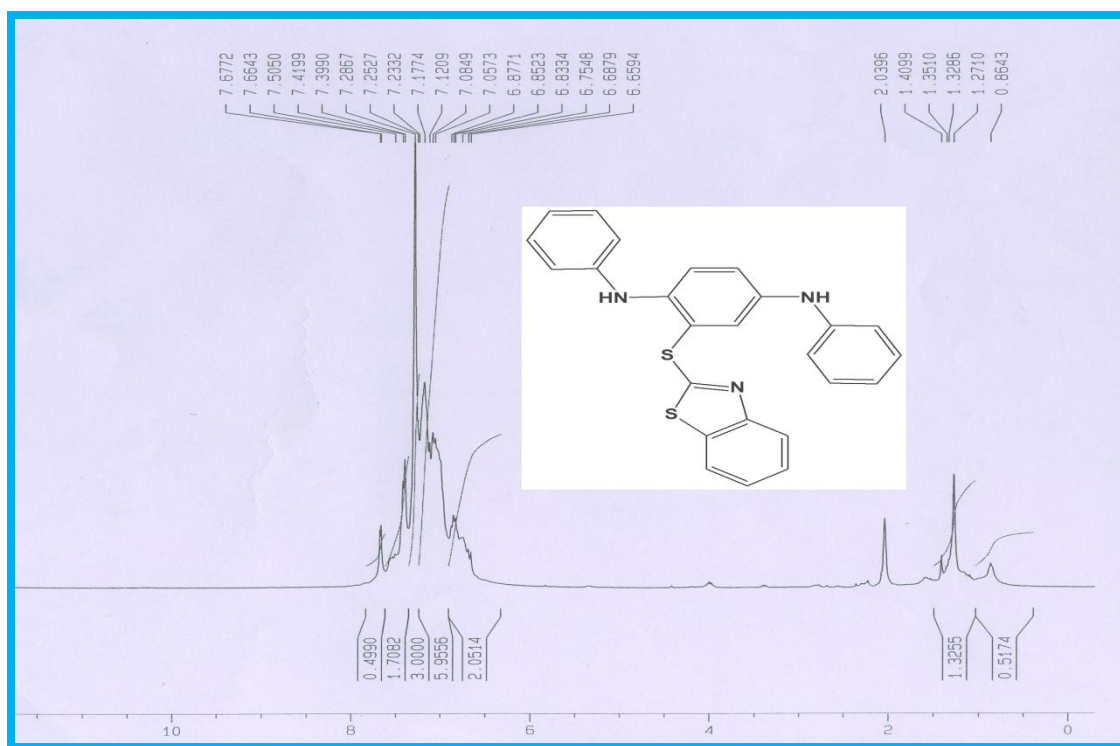

$^{13}\text{C}$  NMR spectrum of **2e**

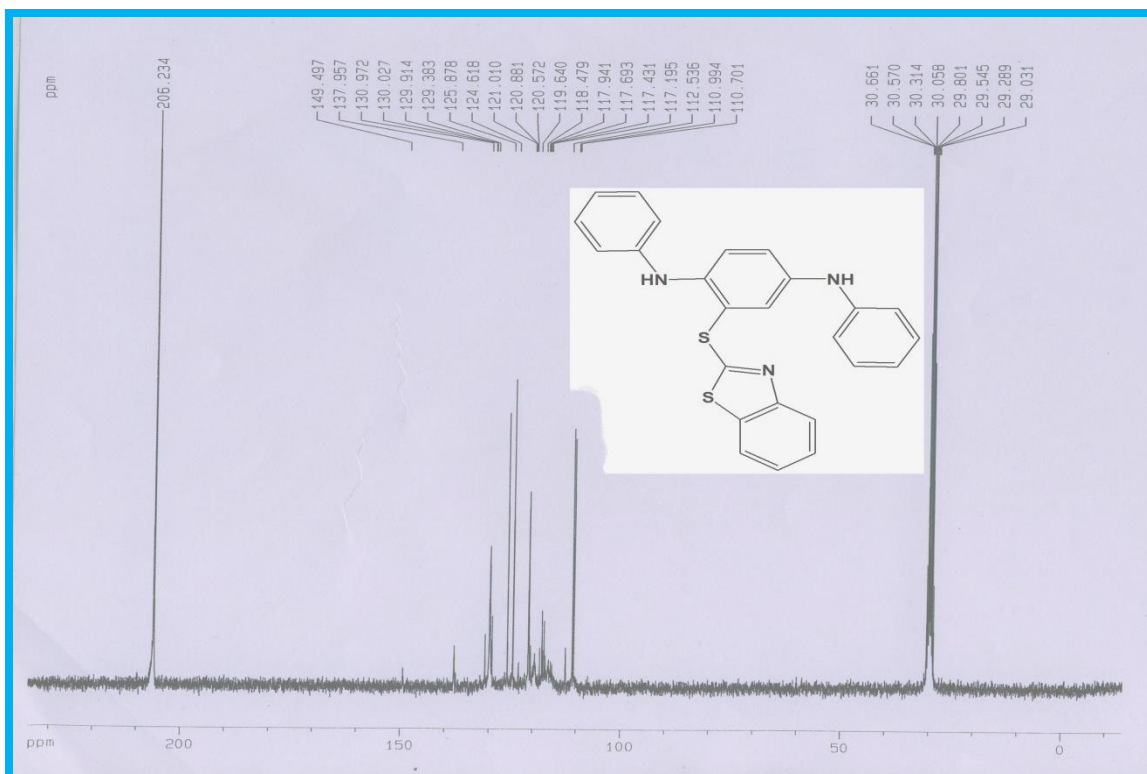

FT-IR spectrum of **2e**

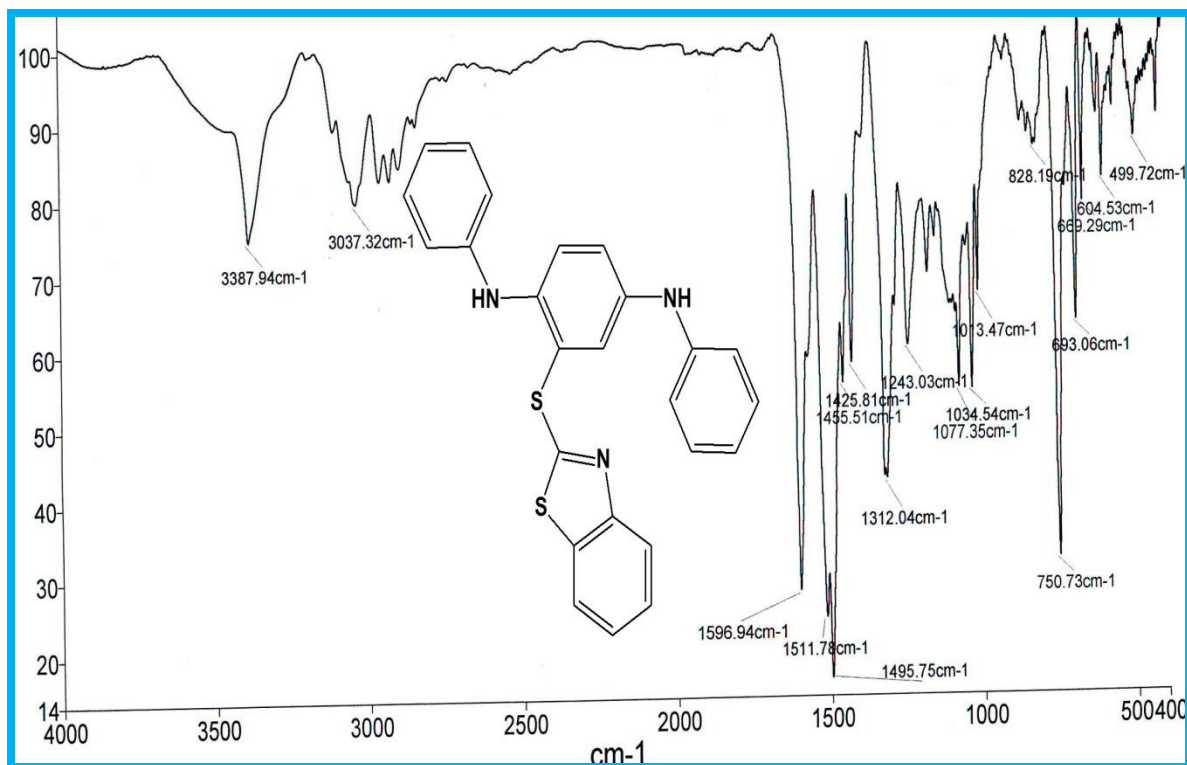



MS spectrum of **2e**

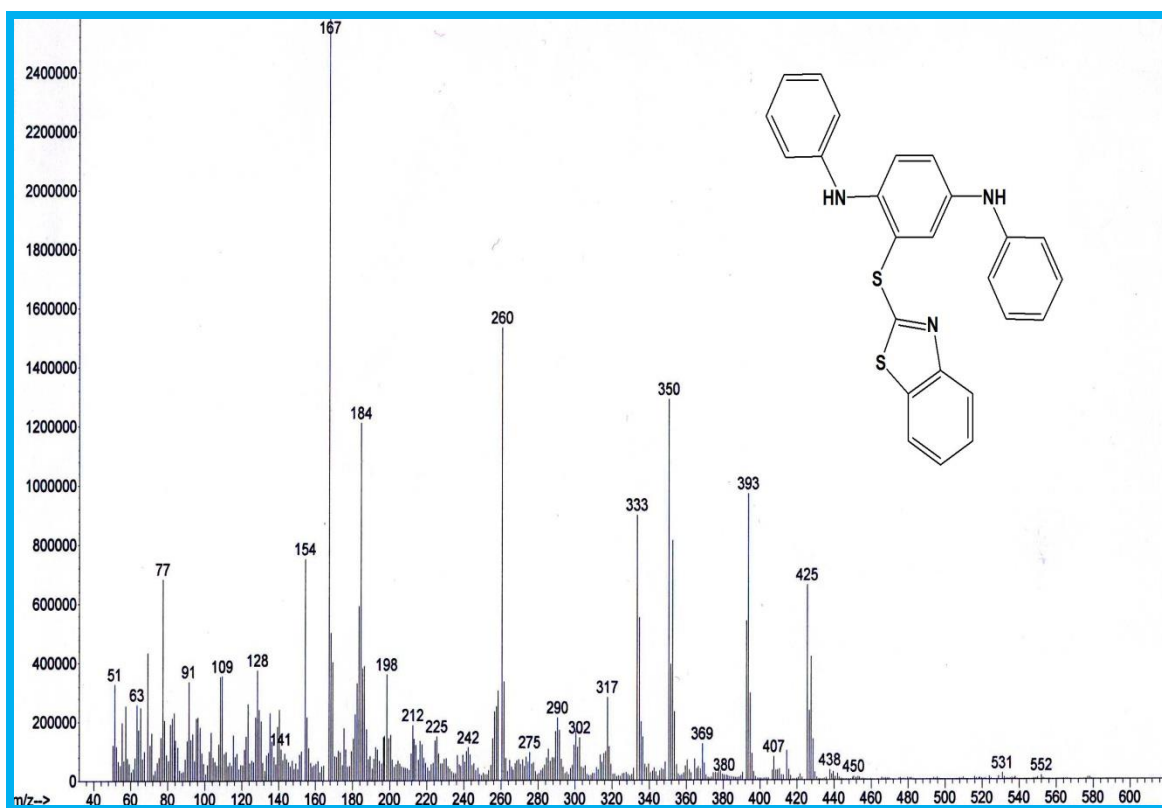

Supplement: c4ra17102k1.pdf [file c4ra17102k1.pdf]
